# Supplementary material for: ZEB1 knockdown mediated using polypeptide cationic micelles inhibits metastasis and effects sensitization to a chemotherapeutic drug for cancer therapy
Source: Royal Society of Chemistry journal article supplement (doi:10.1039/c4nr01518e), 2014-01-01
Supplement: c4nr01518e1.pdf [file c4nr01518e1.pdf]

## Supporting Information

Figure S1

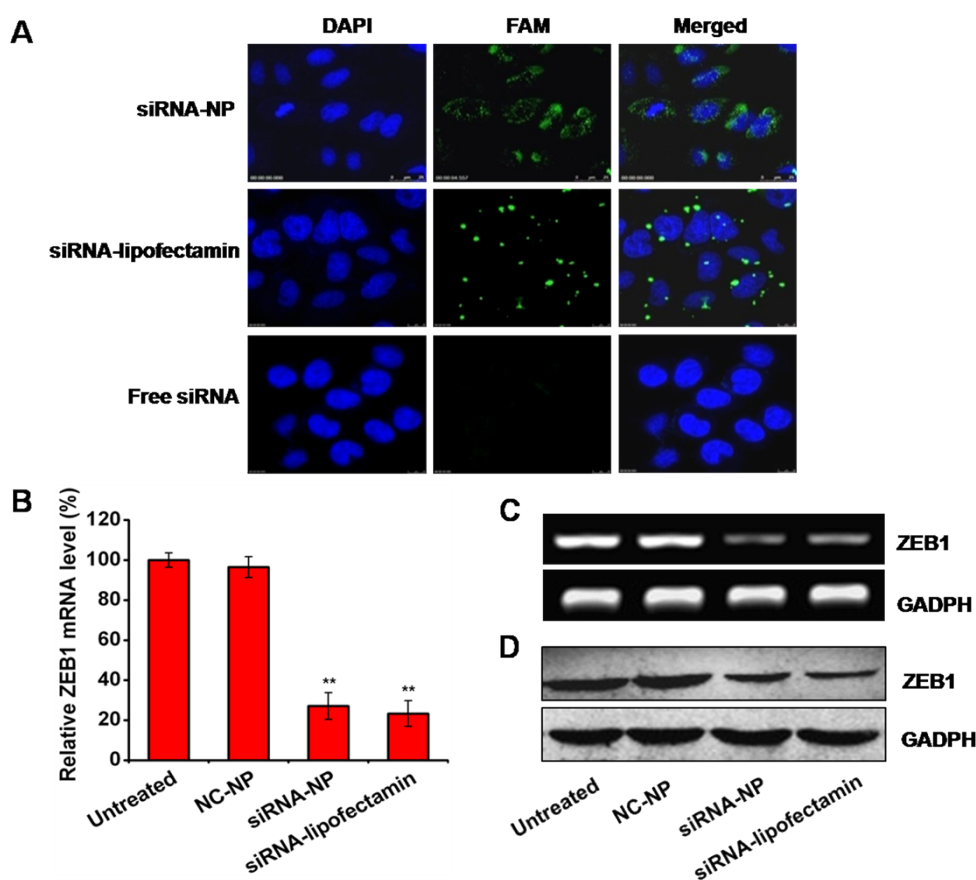

**Figure S1.** Uptake of siRNA and knockdown efficiency of ZEB1 in vitro. (A) Confocal laser scanning microscope (CLSM) image of intracellular distribution of FAM-siRNA in H460 cells after incubation with NP-siRNA, liposome-siRNA and free siRNA for 4h. The siRNA was labeled with FAM (green). The nucleus was counterstained with DAPI (blue). (B) Relative mRNA level of ZEB1 quantified by real-time PCR analysis. (C) Representative ZEB1 mRNA expression evaluated by RT-PCR. (D) Representative ZEB1 protein expression determined by Western blot analysis. H460 cells were transfected with siRNA in different formulations: (1) untreated; (2) NC-NP; (3) siRNA-NP; (4) siRNA-lipofectamin. The concentrations of ZEB1 siRNA and NC siRNA were 50 nM. \*\* $p < 0.01$  as compared with controls. Data are mean  $\pm$  SD ( $n = 5$ ).

**Table S1****Table S1:** The primers used for RT-PCR and real-time PCR

| Gene       | Primer                                                                                |
|------------|---------------------------------------------------------------------------------------|
| ZEB1       | Forward: 5'-TCCATGCTTAAGAGCGCTAGCT-3'<br>Reverse: 5'-ACCGTAGTTGAGTAGGTGTATGCCA-3'     |
| SOX2       | Forward: 5'-GGGAAATGGGAGGGGTGCAAAGAGG-3'<br>Reverse: 5'-TTGCGTGAGTGTGGATGGGATTGGTG-3' |
| ABCG2      | Forward: 5'-TGCAACAGGAAACAATCCTTGT-3'<br>Reverse: 5'-AGATCGATGCCCTGCTTTACC-3'         |
| E-cadherin | Forward: 5'-CGGGAATGCAGTTGAGGATC-3'<br>Reverse: 5'-AGGATGGTGTAAGCGATGGC-3'            |
| GADPH      | Forward: 5'-GTGTTCTACCCCAATGTGT-3'<br>Reverse: 5'-ATTGTCATACCAGGAAATGAGCTT-3'         |
